# Supplementary material
Source: PubMed Central journal article supplement (PMC5689117)
Supplement: Supp_Table1.pdf [file Supp_Table1.pdf]

## Supplementary Data

SUPPLEMENTARY TABLE S1. SUMMARY OF FACTOR LOADING AND CROSS LOADING  
(INCLUDED CROSS LOADINGS HIGHER THAN >0.30)

|                                                                                                                                                        | <i>Social<br/>communication</i> | <i>Restrictive<br/>behavior</i> | <i>Mental<br/>health</i> | <i>Self-<br/>regulation</i> | <i>Challenging<br/>behavior</i> |
|--------------------------------------------------------------------------------------------------------------------------------------------------------|---------------------------------|---------------------------------|--------------------------|-----------------------------|---------------------------------|
| Q: social communication: reciprocity: affect: *<child's name> responds to familiar things                                                              | 0.800                           |                                 |                          |                             | 0.443                           |
| C: social communication: reciprocity: affect: *<child's name> responds to familiar things                                                              | 0.771                           | 0.496                           | 0.325                    |                             |                                 |
| C: social communication: reciprocity: affect: *<child's name> smiles in response to smile from familiar person                                         | 0.824                           |                                 |                          | 0.509                       |                                 |
| C: social communication: reciprocity: affect: *<child's name> shows appropriate affection toward familiar people                                       | 0.818                           |                                 |                          | 0.361                       |                                 |
| C: social communication: reciprocity: affect: *<child's name> is sensitive to the emotional needs of others                                            | 0.818                           | 0.442                           |                          |                             |                                 |
| C: social communication: reciprocity: affect: *<child's name> tries to comfort others when they are hurt or sad                                        | 0.805                           |                                 |                          |                             |                                 |
| C: social communication: reciprocity: affect: *<child's name> comments on other people's emotions                                                      | 0.824                           |                                 |                          | 0.509                       |                                 |
| C: social communication: reciprocity: joint attention: *<child's name> looks when he/she is called or praised                                          | 0.732                           |                                 |                          | 0.583                       |                                 |
| Q: social communication: reciprocity: joint attention: *<child's name> shows attention to what other people are looking at                             | 0.774                           |                                 |                          |                             | 0.367                           |
| C: social communication: reciprocity: joint attention: *<child's name> shows attention to what other people are looking at                             | 0.905                           | 0.370                           |                          |                             |                                 |
| C: social communication: reciprocity: joint attention: *<child's name> looks where another person is looking and pointing                              | 0.795                           | 0.382                           |                          |                             |                                 |
| C: social communication: reciprocity: joint attention: *<child's name> gestures and looks back and forth to others to share the experience with them   | 0.905                           | 0.370                           |                          |                             |                                 |
| C: social communication: reciprocity: joint attention: *<child's name> is able to imitate simple actions                                               | 0.905                           | 0.370                           |                          |                             |                                 |
| F: social communication: reciprocity: joint attention: *<child's name> imitates an action sometime after he/she originally observed it                 | 0.756                           |                                 |                          | 0.411                       | 0.364                           |
| C: social communication: reciprocity: joint attention: *<child's name> imitates an action sometime after he/she originally observed it                 | 0.818                           | 0.442                           |                          |                             |                                 |
| C: social communication: reciprocity: joint attention: *<child's name> imitates or reflects facial expressions                                         | 0.777                           |                                 | 0.476                    |                             |                                 |
| C: social communication: reciprocity: play and creativity: *<child's name> gives things to others for the purpose of sharing                           | 0.905                           | 0.370                           |                          |                             |                                 |
| C: social communication: reciprocity: play and creativity: *<child's name> uses objects in place of others                                             | 0.905                           | 0.370                           |                          |                             |                                 |
| Q: social communication: reciprocity: play and creativity: *<child's name> engages in make believe play with another person                            | 0.806                           |                                 |                          | 0.337                       |                                 |
| C: social communication: reciprocity: play and creativity: *<child's name> engages in make believe play with another person                            | 0.818                           | 0.442                           |                          |                             |                                 |
| C: social communication: reciprocity: play and creativity: *<child's name> can think creatively and take on a different perspective                    | 0.789                           | 0.382                           |                          |                             |                                 |
| C: social communication: reciprocity: play and creativity: *<child's name> spends time with friends who are not family members                         | 0.695                           | 0.571                           |                          |                             |                                 |
| C: social communication: reciprocity: play and creativity: *<child's name> is able to get along with others of a similar age                           | 0.830                           | 0.352                           |                          |                             |                                 |
| C: social communication: reciprocity: conversation: *<child's name> is able to end conversations appropriately                                         | 0.824                           |                                 |                          | 0.509                       |                                 |
| C: social communication: nonverbal communication: facial expression: *<child's name> shows a range of facial expressions                               | 0.617                           | 0.355                           |                          |                             |                                 |
| I: social communication: nonverbal communication: facial expression: *<child's name> uses facial expressions that are not appropriate to the situation | 0.713                           | 0.344                           |                          |                             |                                 |

(continued)

SUPPLEMENTARY TABLE S1. (CONTINUED)

|                                                                                                                                           | <i>Social communication</i> | <i>Restrictive behavior</i> | <i>Mental health</i> | <i>Self-regulation</i> | <i>Challenging behavior</i> |
|-------------------------------------------------------------------------------------------------------------------------------------------|-----------------------------|-----------------------------|----------------------|------------------------|-----------------------------|
| F: social communication: nonverbal communication: eye contact: *<child's name> uses eye contact and gazes appropriately                   | 0.763                       | 0.371                       |                      |                        |                             |
| C: social communication: nonverbal communication: eye contact: *<child's name> uses eye contact and gazes appropriately                   | 0.741                       | 0.414                       |                      |                        |                             |
| F: social communication: nonverbal communication: eye contact: *<child's name> looks at others in anticipation of their actions           | 0.795                       | 0.353                       |                      |                        |                             |
| F: social communication: nonverbal communication: eye contact: *<child's name> makes eye contact when communicating or being spoken to    | 0.759                       | 0.370                       |                      |                        |                             |
| C: social communication: nonverbal communication: eye contact: *<child's name> makes eye contact when communicating or being spoken to    | 0.739                       | 0.432                       |                      |                        |                             |
| C: social communication: nonverbal communication: gestures: *<child's name> waves "Hello" and "Goodbye"                                   | 0.905                       | 0.370                       |                      |                        |                             |
| C: social communication: nonverbal communication: gestures: *<child's name> uses conventional gestures                                    | 0.905                       | 0.370                       |                      |                        |                             |
| C: social communication: nonverbal communication: gestures: *<child's name> requests items by pointing                                    | 0.905                       | 0.370                       |                      |                        |                             |
| C: social communication: nonverbal communication: gestures: *<child's name> requests items with an open-handed reach                      | 0.754                       |                             |                      | 0.473                  |                             |
| C: social communication: nonverbal communication: gestures: *<child's name> combines gestures with vocalizations to enhance communication | 0.789                       | 0.382                       |                      |                        |                             |
| C: social communication: verbal communication: *<child's name> has an unusual tone of voice when speaking                                 | 0.780                       | 0.450                       |                      |                        |                             |
| C: social communication: verbal communication: *<child's name> offers information about his/her own thoughts or feelings                  | 0.905                       | 0.370                       |                      |                        |                             |
| I: social communication: verbal communication: *<child's name> misses the point of jokes                                                  | 0.820                       |                             |                      | 0.458                  |                             |
| C: restrictive repetitive behavior: resistance to change: *<child's name> is able to adapt to change and find new ways to solve problems  |                             | 0.771                       | 0.453                |                        |                             |
| I: restrictive repetitive behavior: stereotypical behavior: *<child's name> makes repetitive movements                                    |                             | 0.797                       |                      |                        | 0.525                       |
| F: restrictive repetitive behavior: hypersensitivity: *<child's name> touches or strokes objects                                          |                             | 0.860                       | 0.321                |                        |                             |
| C: mental health: mood: *<child's name> has sudden changes in mood                                                                        | 0.756                       |                             | 0.819                |                        |                             |
| F: mental health: mood: *<child's name> appears sad, unhappy, or depressed                                                                | 0.456                       |                             | 0.712                |                        |                             |
| C: mental health: mood: *<child's name> is cheerful and has fun                                                                           | 0.657                       |                             | 0.819                |                        |                             |
| C: mental health: mood: *<child's name> seems lonely                                                                                      | 0.543                       |                             | 0.704                |                        |                             |
| F: mental health: mood: *<child's name> complains of loneliness                                                                           | 0.469                       |                             | 0.752                |                        |                             |
| C: mental health: mood: *<child's name> complains of loneliness                                                                           | 0.426                       |                             | 0.572                |                        |                             |
| F: mental health: irritability: *<child's name> demands must be met immediately                                                           | 0.478                       |                             | 0.682                |                        |                             |
| C: mental health: irritability: *<child's name> demands must be met immediately                                                           |                             | 0.353                       | 0.697                |                        |                             |
| F: mental health: irritability: *<child's name> cries over minor annoyances and hurts                                                     | 0.754                       |                             | 0.767                |                        |                             |
| F: mental health: irritability: *<child's name> is irritable and whiny                                                                    | 0.685                       |                             | 0.700                |                        |                             |
| F: mental health: anxiety: *<child's name> worries about his/her physical health                                                          | 0.698                       |                             | 0.867                |                        |                             |
| I: mental health: anxiety: *<child's name> worries about his/her physical health                                                          | 0.645                       |                             | 0.887                |                        |                             |
| F: mental health: anxiety: *<child's name> clings to adults or is too dependent on them                                                   | 0.758                       |                             | 0.843                |                        |                             |
| I: self-regulation: impulsivity: *<child's name> acts without thinking                                                                    | 0.568                       |                             |                      | 0.778                  |                             |
| I: self-regulation: impulsivity: *<child's name> speaks without thinking                                                                  | 0.569                       |                             |                      | 0.686                  |                             |
| I: self-regulation: impulsivity: *<child's name> acts recklessly                                                                          | 0.458                       |                             |                      | 0.730                  |                             |
| C: self-regulation: motivation: *<child's name> is withdrawn                                                                              | 0.568                       |                             |                      | 0.795                  |                             |
| C: self-regulation: motivation: *<child's name> prefers to play alone                                                                     |                             | 0.352                       |                      | 0.830                  |                             |
| C: self-regulation: motivation: *<child's name> prefers to be alone                                                                       | 0.554                       | 0.333                       |                      | 0.750                  |                             |

(continued)

SUPPLEMENTARY TABLE S1. (CONTINUED)

|                                                                                                                   | <i>Social<br/>communication</i> | <i>Restrictive<br/>behavior</i> | <i>Mental<br/>health</i> | <i>Self-<br/>regulation</i> | <i>Challenging<br/>behavior</i> |
|-------------------------------------------------------------------------------------------------------------------|---------------------------------|---------------------------------|--------------------------|-----------------------------|---------------------------------|
| C: self-regulation: motivation: *<child's name> leaves tasks unfinished                                           | 0.568                           |                                 |                          | 0.791                       |                                 |
| C: self-regulation: motivation: *<child's name> fails to complete tasks                                           | 0.689                           | 0.370                           |                          | 0.905                       |                                 |
| C: self-regulation: motivation: *<child's name> has difficulties paying attention to fun activities               | 0.569                           |                                 |                          | 0.791                       |                                 |
| C: self-regulation: motivation: *<child's name> will respond to requests to do things that he/she knows how to do | 0.598                           | 0.370                           |                          | 0.905                       |                                 |
| F: challenging behavior: aggression: *<child's name> is cruel or mean to others                                   | 0.685                           |                                 |                          |                             | 0.800                           |
| I: challenging behavior: elopement: *<child's name> runs away                                                     | 0.685                           |                                 |                          |                             | 0.786                           |

Anchor combinations: frequency (F), intensity (I), quality (Q), context (C).

\* Child's name is inserted in the text presented to parents.
